# Supplementary material for: Prevalence and Correlates of Vitamin D Deficiency among Young South African Infants: A Birth Cohort Study
Source: MDPI journal article supplement (doi:10.3390/nu13051500), 2021-04-29
Supplement: s1 [file s1]

## Supplementary Materials

**Table S1.** Comparison of 774 infants included versus 369 infants excluded in the Vitamin D study, Cape Town, South Africa.

| Variables               | Included in vitamin D study ( <i>n</i> =774) | Excluded in the vitamin D study ( <i>n</i> =369) |
|-------------------------|----------------------------------------------|--------------------------------------------------|
| Study site              |                                              |                                                  |
| Mbekweni                | 411 (53.1)                                   | 223 (60.4)                                       |
| TC Newmann              | 363 (46.9)                                   | 146 (39.6)                                       |
| Female                  | 366 (47.3)                                   | 188 (51.0)                                       |
| HIV Exposed             | 166 (21.4)                                   | 82 (22.4)                                        |
| Prmaturity (< 37 weeks) | 98 (12.7)                                    | 96 (26.0)                                        |
| Season birth            |                                              |                                                  |
| Summer (Dec–Feb)        | 220 (28.4)                                   | 68 (18.2)                                        |
| Autumn (March–May)      | 195 (25.2)                                   | 86 (23.3)                                        |
| Winter (June–August)    | 189 (24.4)                                   | 117 (31.7)                                       |
| Spring (Sept– Nov)      | 170 (22.0)                                   | 99 (26.8)                                        |
| Mother’s education      |                                              |                                                  |
| Primary                 | 58 (7.5)                                     | 28 (7.6)                                         |
| Some Secondary          | 413 (53.4)                                   | 196 (53.1)                                       |
| Completed Secondary     | 256 (33.1)                                   | 119 (32.2)                                       |
| Some Tertiary           | 47 (6.1)                                     | 26 (7.1)                                         |
| Breastfeeding initiated | 718 (92.8)                                   | 329 (90.4)                                       |
| Socioeconomic status    |                                              |                                                  |
| Lowest                  | 184 (23.8)                                   | 90 (24.4)                                        |
| Moderate Low            | 195 (25.2)                                   | 101 (27.4)                                       |
| Moderate high           | 198 (25.6)                                   | 92 (24.9)                                        |
| High                    | 197 (25.4)                                   | 86 (23.3)                                        |
